# Supplementary material for: Determining the structure of protein-bound ceramides, essential lipids for skin barrier function
Source: PubMed Central journal article supplement (PMC10641502; doi:10.1016/j.isci.2023.108248), 2023-10-18
Supplement: mmc1.pdf [file mmc1.pdf]

iScience, Volume 26

## **Supplemental information**

### **Determining the structure of protein-bound ceramides, essential lipids for skin barrier function**

**Yusuke Ohno, Tetsuya Nakamura, Takafumi Iwasaki, Akira Katsuyama, Satoshi Ichikawa, and Akio Kihara**

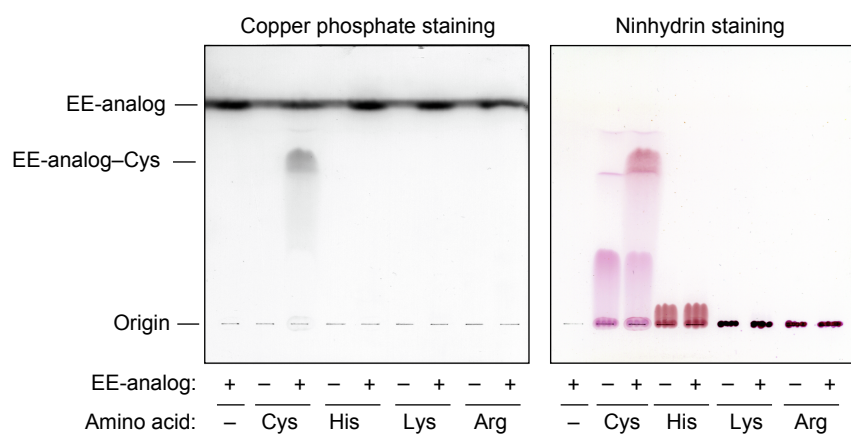

**Figure S1. Conjugate formation in the absence of water, related to Figure 2.** EE-analog (2 mM, dissolved in CH<sub>3</sub>OH) was mixed with an amino acid (Cys, Ser, His, Arg, or Lys; 2 mM each, dissolved in CH<sub>3</sub>OH) and incubated at 37 °C for 1 h. The reaction products were separated via TLC using CHCl<sub>3</sub>/CH<sub>3</sub>OH (1:2, v/v) as a developing solvent and visualized using copper phosphate staining (left) or ninhydrin staining (right).

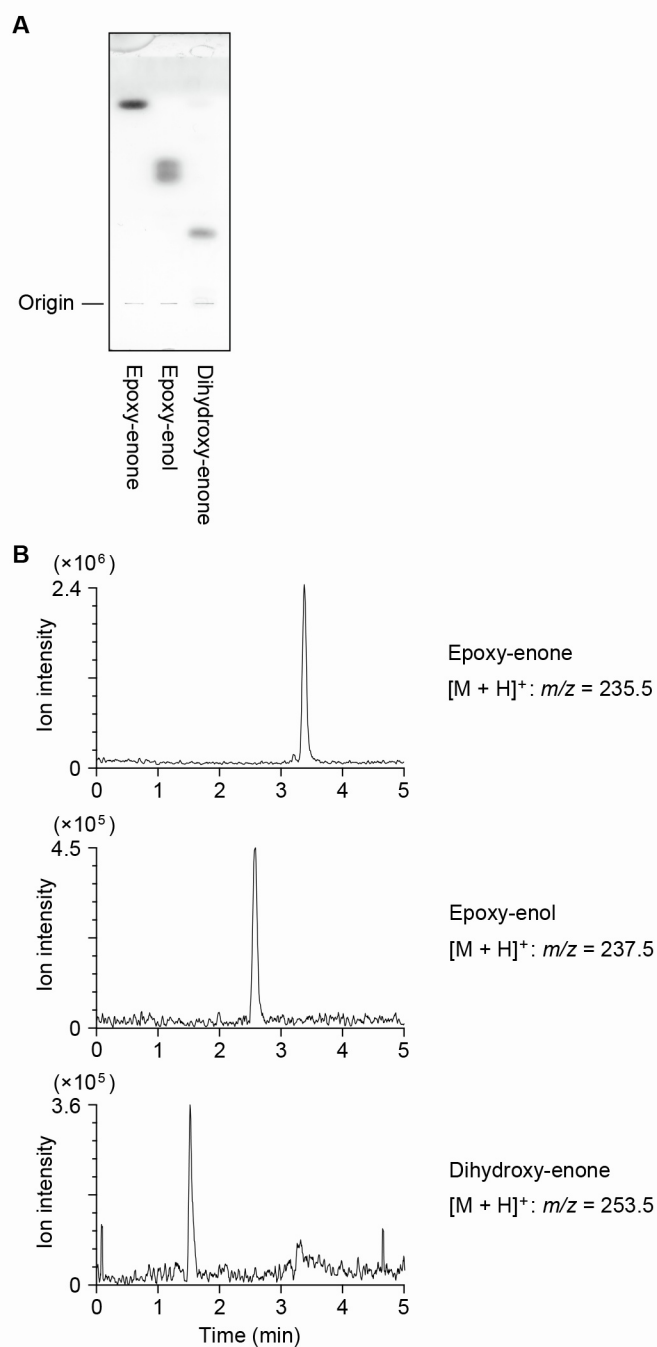

**Figure S2. Detection of EE-analog and its derivatives, related to Figure 3.**  
 (A) EE-analog and its derivatives were separated by TLC and subjected to copper phosphate staining.  
 (B) The molecular ions with  $m/z$  = 235.5, 237.5, and 253.5 were detected via LC-MS using single ion monitoring mode.

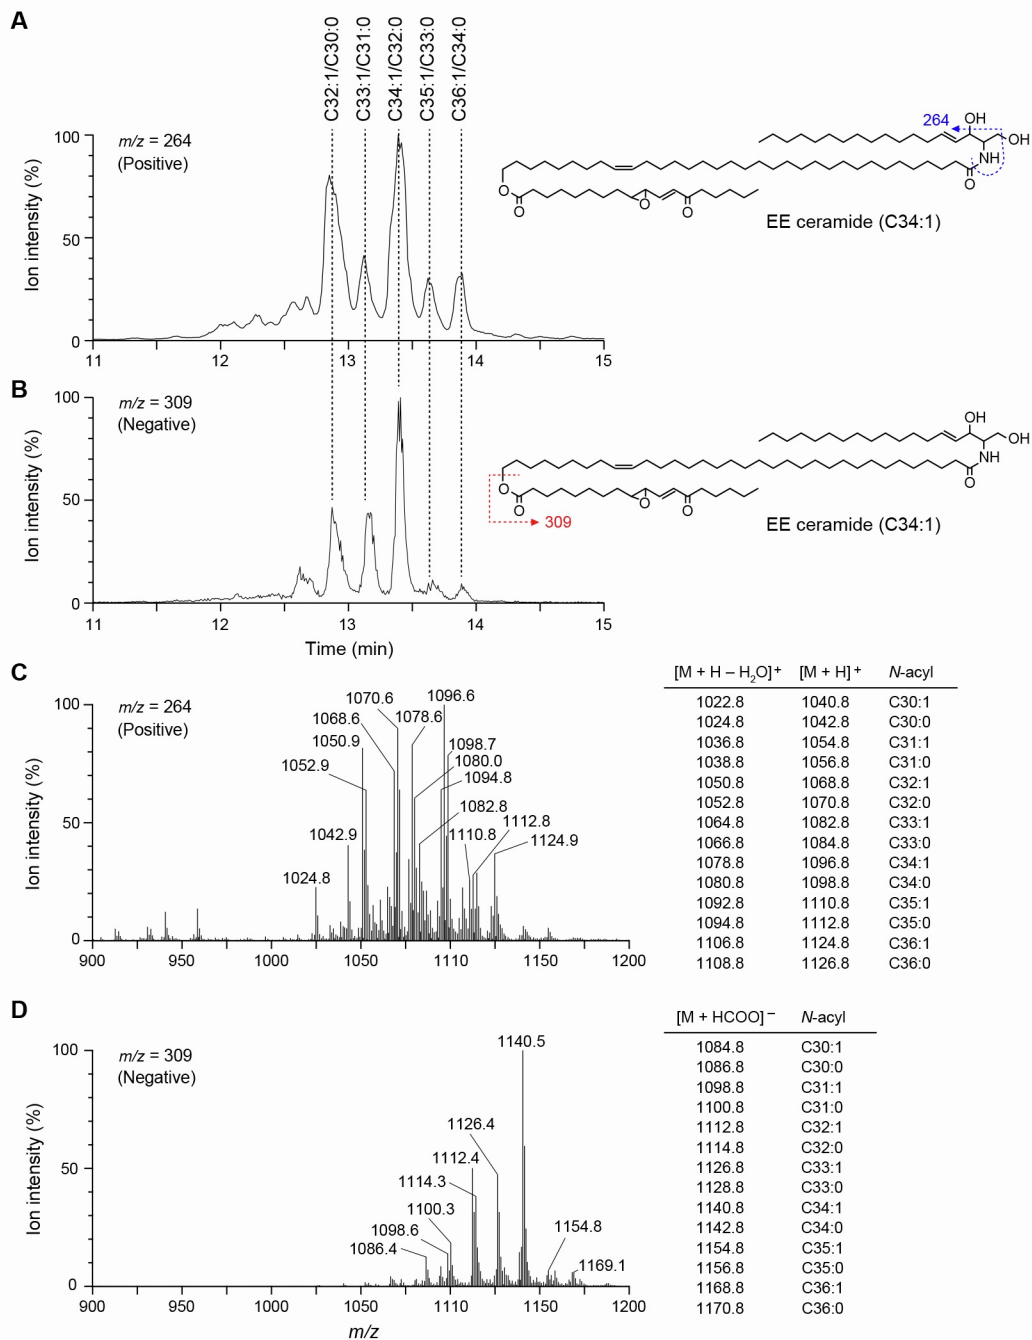

**Figure S3. Detection of EE ceramides by LC-MS/MS, related to Figure 4.**

EE ceramides were extracted from the protein-bound ceramide fractions and subjected to LC-MS/MS analysis using precursor ion scanning mode (scan range of  $m/z$ , 900–1,200) to detect precursor ions with the product ion of  $m/z = 264$  (positive ion mode) (A and C) and those of  $m/z = 309$  (negative ion mode) (B and D). Total ion current chromatograms (A and B) and the mass spectra of the retention time of 12–14 min (C and D) are shown.

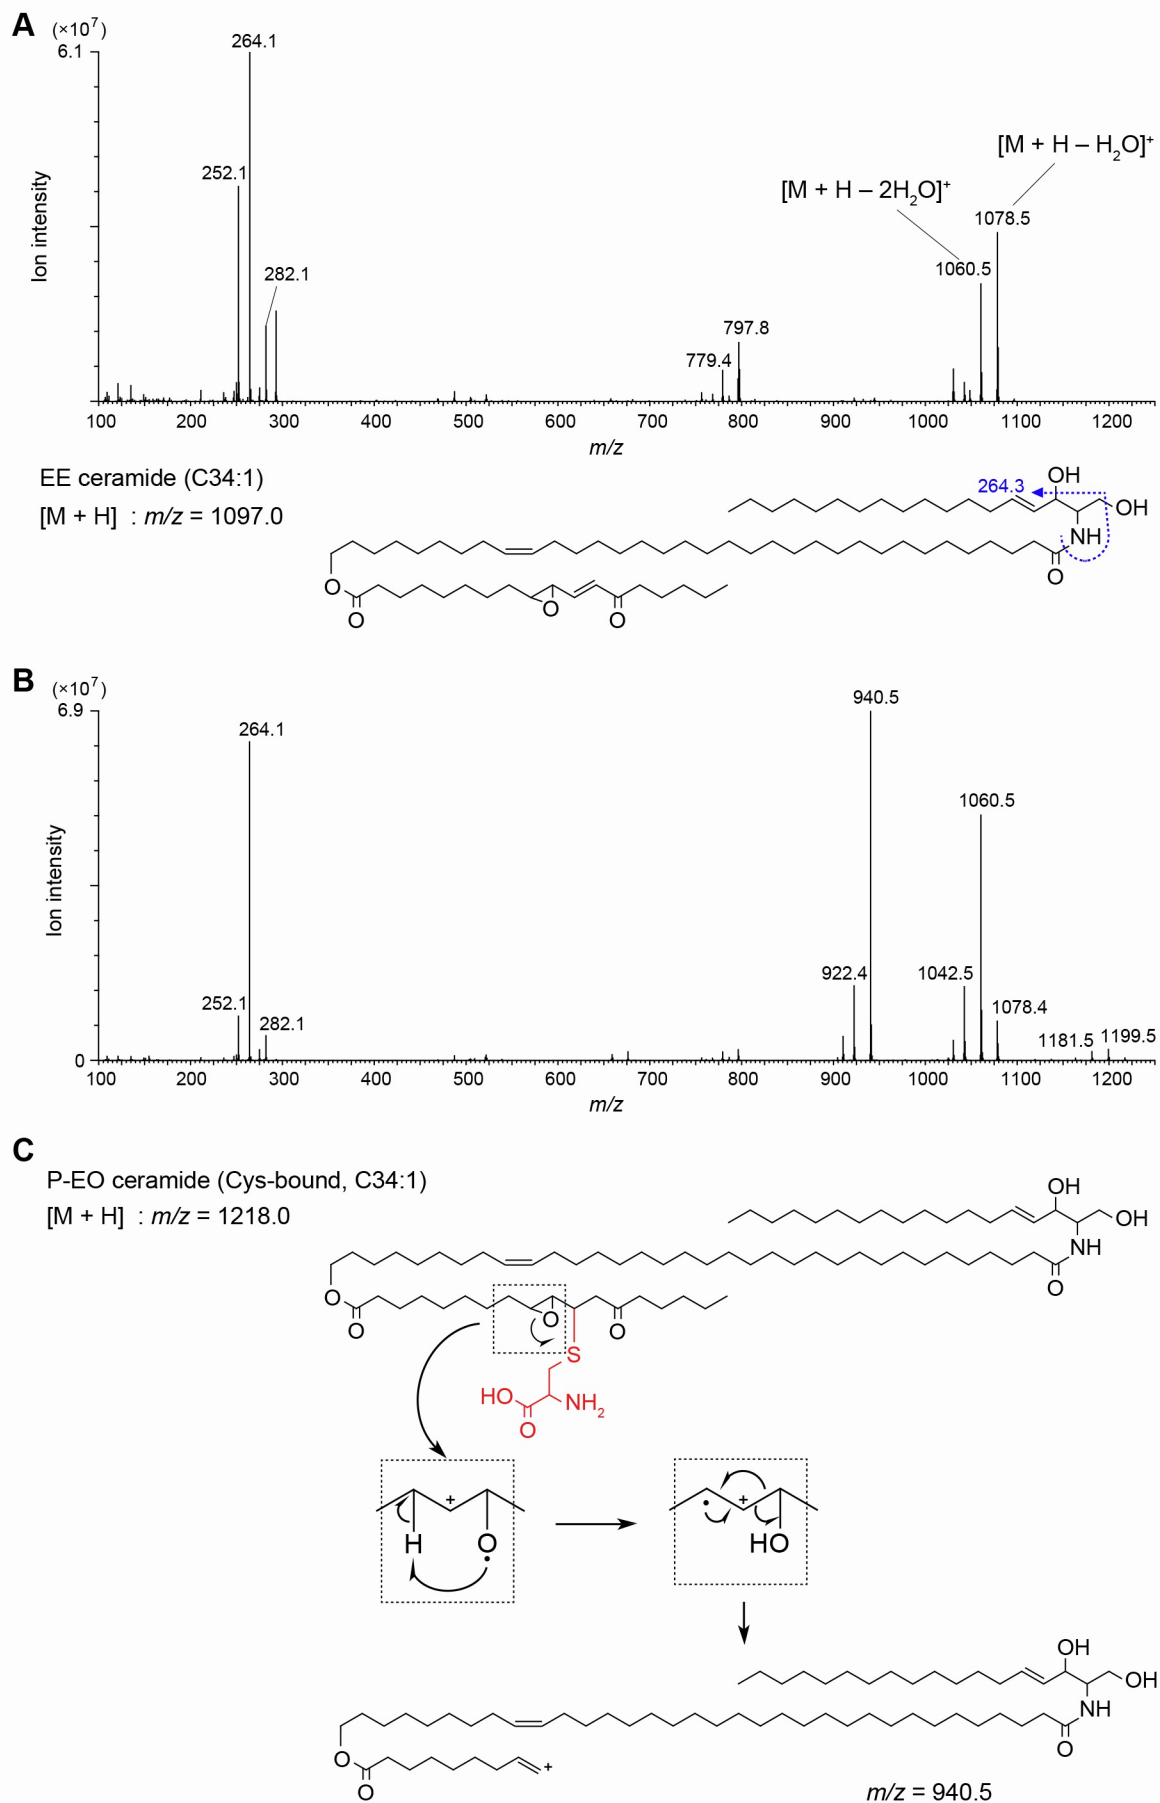

**Figure S4. Product ion analysis of the EE ceramide–Cys conjugate, related to Figure 4.**

(A–C) EE ceramides were incubated with 50 mM Tris-HCl (pH 7.4) (A) or Cys (B and C) at 37 °C for 1 h and subjected to LC-MS/MS analysis using product ion scanning mode. The proton adduct ion ( $m/z = 1,096.8$ ) of EE ceramide containing C34:1  $\omega$ -OH FA (A) and the proton adduct ion ( $m/z = 1,218.0$ ) of the corresponding EE ceramide–Cys conjugate (B) were selected as the precursor ions and the product ions were detected (scan range,  $m/z = 100$ – $1,250$ ). (C) The predicted fragmentation mechanism by which a product ion with  $m/z = 940.5$  would be generated.

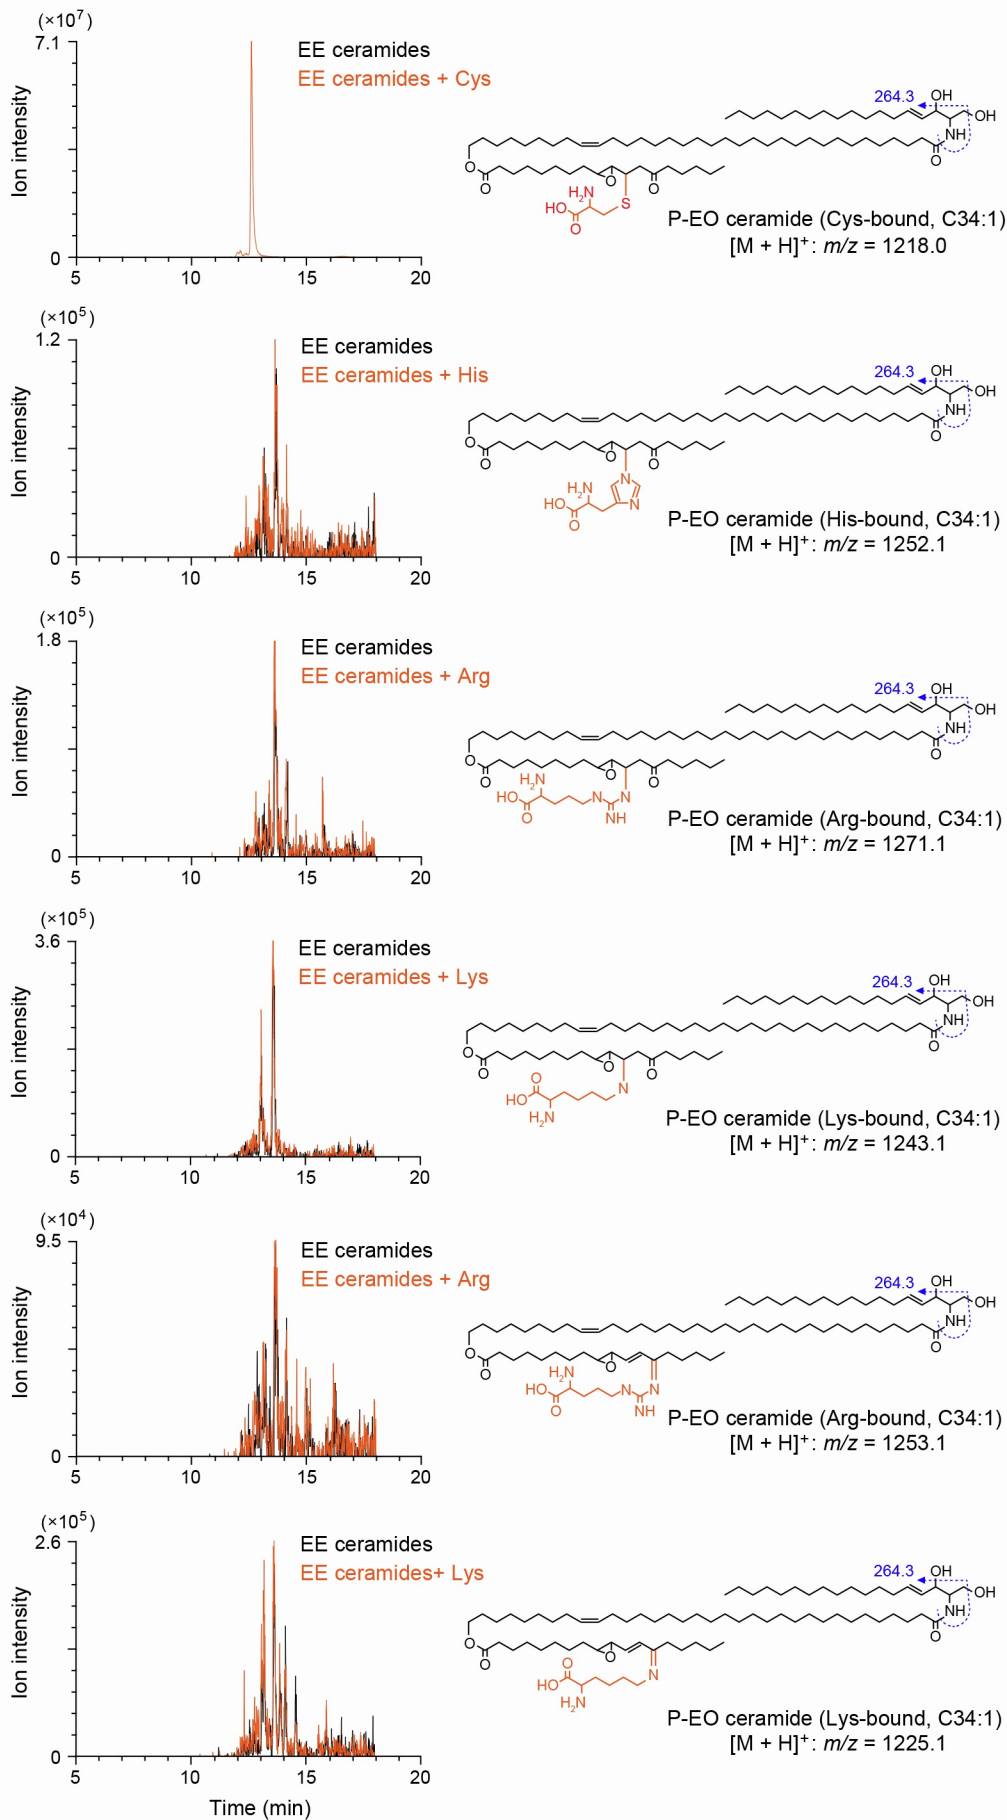

**Figure S5. Detection of conjugates of EE ceramide and amino acid, related to Figure 4.** EE ceramides were incubated with an amino acid (Cys, His, Arg, or Lys; 2 mM each) at 37 °C for 1 h and subjected to LC-MS/MS analysis using MRM mode. The proton adduct ions of each amino acid and EE ceramide containing C34:1 conjugates were selected as the precursor ions, and the product ion of  $m/z = 264$  was selected.

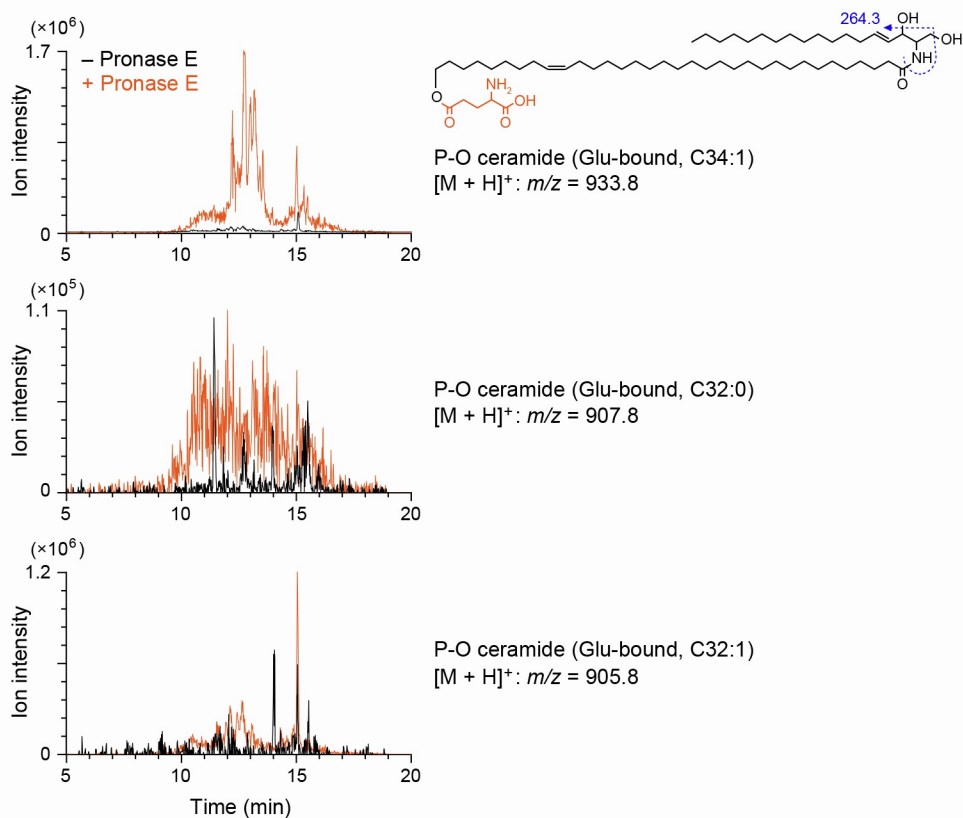

**Figure S6. Absence of Glu-bound P-O ceramides in the epidermis, related to Figure 6.** Protein-bound ceramide fractions prepared from WT and *Cyp4f39* KO mouse epidermis (10 mg) were digested with pronase E (1 mg/mL) at 37 °C for 2 h and subjected to LC-MS/MS analysis using MRM mode. The proton adduct ions of Glu-bound P-O ceramide containing C32:1, C32:0, or C34:1 *N*-acyl moiety were selected as the precursor ions, and the product ion of  $m/z = 264$  was selected.

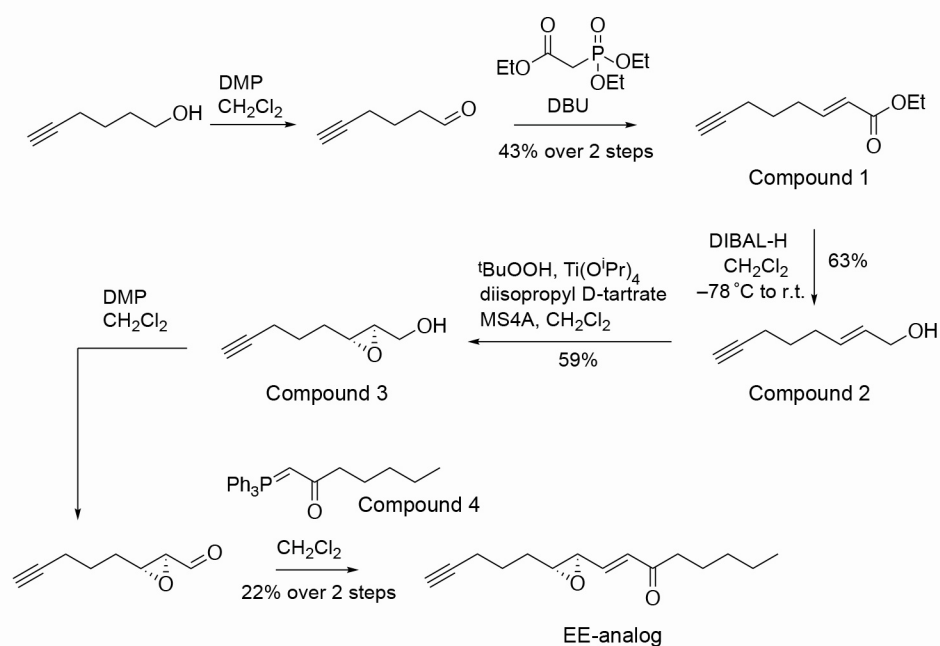

**Figure S7. Scheme of EE-analog synthesis, related to Figure 2.**

EE-analog was synthesized via the reaction scheme composed of six reaction steps as indicated. DMP, Dess-Martin periodinane; DBU, 1,8-diazabicyclo[5.4.0]undec-7-ene; DIBAL-H, diisobutylaluminium hydride;  $^t\text{BuOOH}$ , *tert*-Butyl hydroperoxide;  $\text{Ti}(\text{O}^i\text{Pr})_4$ , tetrakisopropyl orthotitanate; and MS4A, molecular sieves 4A.



**Table S1.** MRM settings for detection of ceramide species in LC-MS/MS analyses.

| Ceramides              | N-acyl                       | Precursor ion (Q1)                      |                      | Product ion (Q3) | Cone voltage (V) | Collision energy (eV) |
|------------------------|------------------------------|-----------------------------------------|----------------------|------------------|------------------|-----------------------|
|                        |                              | [M + H – H <sub>2</sub> O] <sup>+</sup> | [M + H] <sup>+</sup> |                  |                  |                       |
| EE-ceramides           | C30:0                        | 1025.0                                  | 1043.0               | 264.3            | 30               | 35                    |
|                        | C30:1                        | 1023.0                                  | 1041.0               | 264.3            | 30               | 35                    |
|                        | C32:0                        | 1053.0                                  | 1071.0               | 264.3            | 30               | 40                    |
|                        | C32:1                        | 1051.0                                  | 1069.0               | 264.3            | 30               | 40                    |
|                        | C34:0                        | 1081.0                                  | 1099.0               | 264.3            | 30               | 40                    |
|                        | C34:1                        | 1079.0                                  | 1097.0               | 264.3            | 30               | 40                    |
|                        | C36:0                        | 1109.0                                  | 1127.0               | 264.3            | 30               | 45                    |
|                        | C36:1                        | 1107.0                                  | 1125.0               | 264.3            | 30               | 45                    |
| EE-Cer-Cys conjugates  | C30:0                        |                                         | 1164.0               | 264.3            | 30               | 35                    |
|                        | C30:1                        |                                         | 1162.0               | 264.3            | 30               | 35                    |
|                        | C32:0                        |                                         | 1192.0               | 264.3            | 30               | 40                    |
|                        | C32:1                        |                                         | 1190.0               | 264.3            | 30               | 40                    |
|                        | C34:0                        |                                         | 1220.0               | 264.3            | 30               | 40                    |
|                        | C34:1                        |                                         | 1218.0               | 264.3            | 30               | 40                    |
|                        | C36:0                        |                                         | 1248.0               | 264.3            | 30               | 45                    |
|                        | C36:1                        |                                         | 1246.0               | 264.3            | 30               | 45                    |
| $\omega$ -OH ceramides | C30:0                        | 732.7                                   | 750.7                | 264.3            | 30               | 35                    |
|                        | C30:1                        | 730.7                                   | 748.7                | 264.3            | 30               | 35                    |
|                        | C32:0                        | 760.8                                   | 778.8                | 264.3            | 30               | 35                    |
|                        | C32:1                        | 758.8                                   | 776.8                | 264.3            | 30               | 35                    |
|                        | C34:0                        | 788.8                                   | 806.8                | 264.3            | 30               | 40                    |
|                        | C34:1                        | 786.8                                   | 804.8                | 264.3            | 30               | 40                    |
|                        | C36:0                        | 816.8                                   | 834.8                | 264.3            | 30               | 40                    |
|                        | C36:1                        | 814.8                                   | 832.8                | 264.3            | 30               | 40                    |
| $\alpha$ -OH ceramides | <i>d</i> <sub>9</sub> -C16:0 | 545.5                                   | 563.5                | 264.3            | 30               | 20                    |
